# Supplementary material for: Type II Restriction-Modification System from Gardnerella vaginalis ATCC 14018
Source: MDPI journal article supplement (doi:10.3390/pathogens9090703), 2020-08-27
Supplement: s1 [file s1]

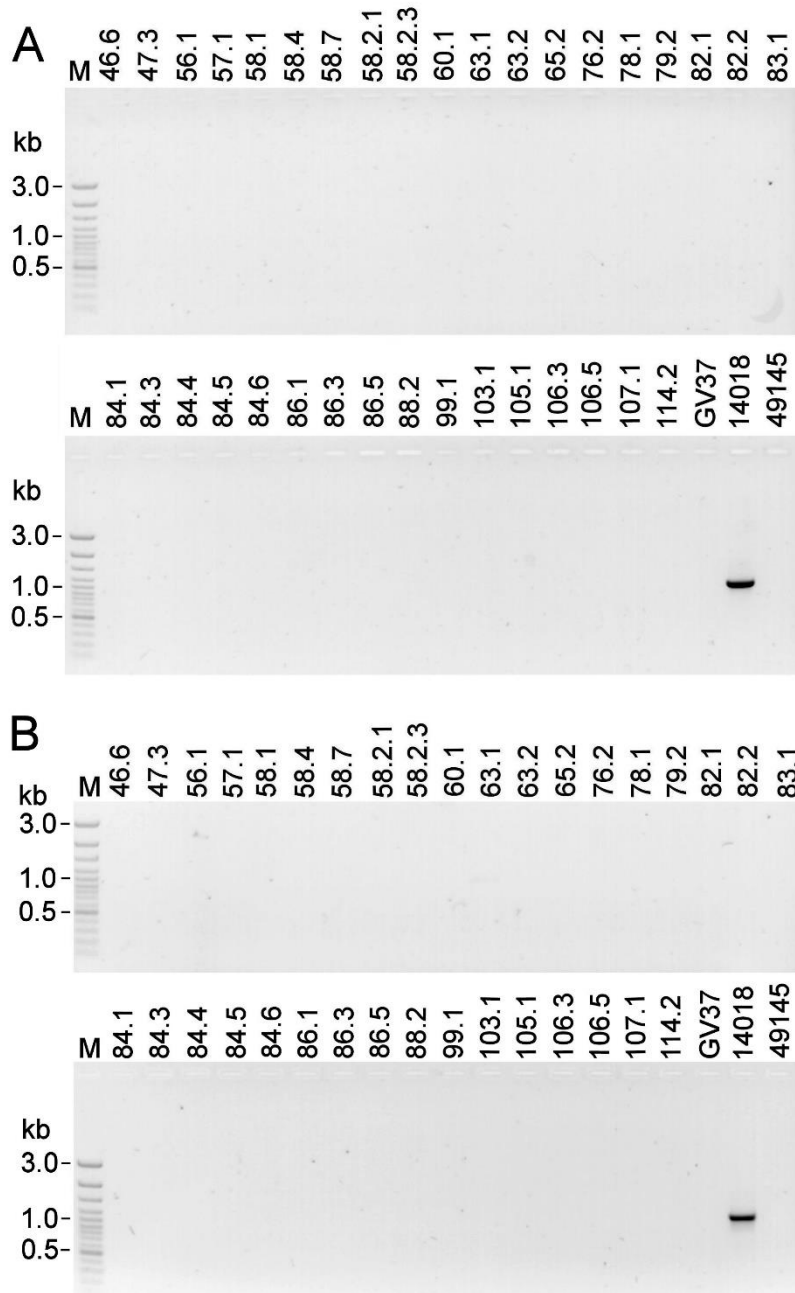

**Figure S3.** Detection of the *gva14018IR* (A) and *gva14018IM* (B) genes in *Gardnerella* spp. isolates by gene-specific PCR with the primer pairs GVRe5/GVRe3 and GVMe5/GVMe3, respectively. Lane M: Gene Ruler 100bp Plus DNA Ladder (Thermo Fisher Scientific).
