# Supplementary material for: Type II Restriction-Modification System from Gardnerella vaginalis ATCC 14018
Source: MDPI journal article supplement (doi:10.3390/pathogens9090703), 2020-08-27
Supplement: s1 [file s1]

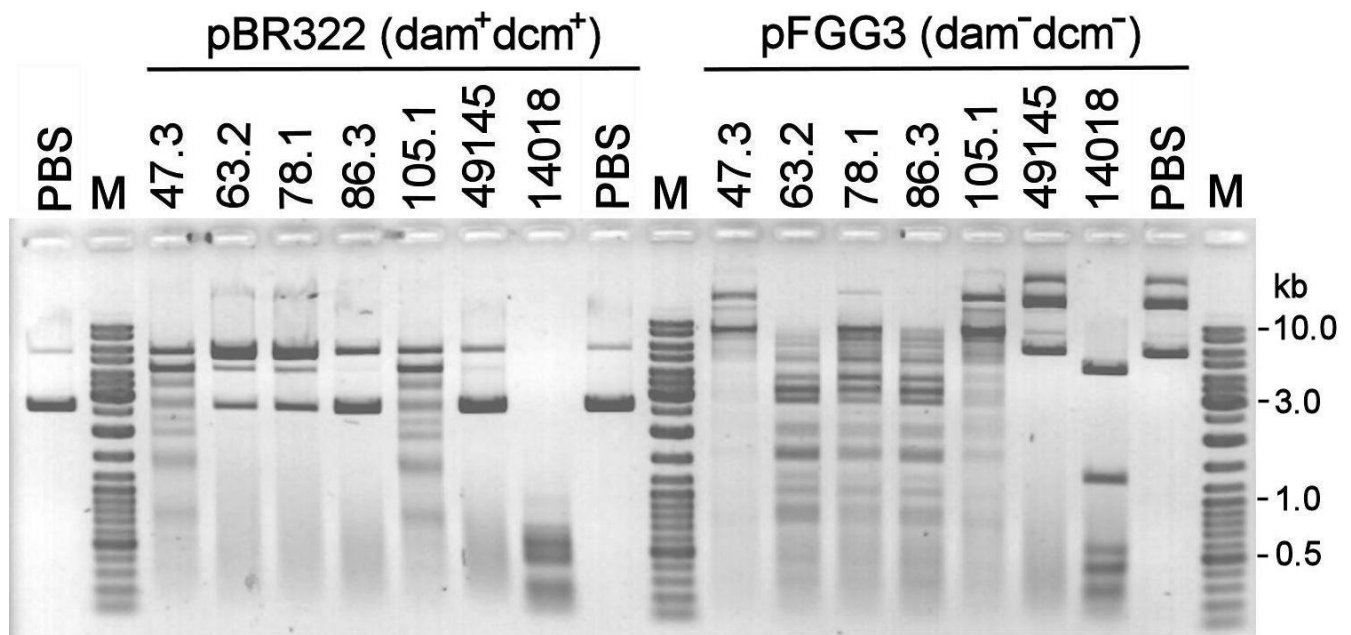

**Figure S2.** REase activity in the clarified whole cell lysates of *Gardnerella* spp. strains 47.3, 63.2, 78.1, 86.3, 105.1, *G. vaginalis* ATCC 49145, and ATCC 14018. *Gardnerella* spp. were cultivated in sTSB medium as described in *Methods*. Isolates 47.3 (after cultivation  $OD_{600}=0.58$ ) and 105.1 ( $OD_{600}=0.51$ ) belong to clade 1, isolates 63.2 ( $OD_{600}=0.76$ ), 78.1 ( $OD_{600}=0.56$ ), and 86.3 ( $OD_{600}=0.75$ ) belong to clade 2. After cultivation *G. vaginalis* ATCC 14018 strain reached  $OD_{600}=0.65$ , *G. vaginalis* ATCC 49145 reached  $OD_{600}=0.98$ . Cells were resuspended in PBS containing Halt™ protease inhibitor cocktail (Thermo Fisher Scientific) and disrupted by sonication. Plasmids pBR322 and pFGG3 (Table S2) were incubated with 2.5  $\mu$ l of cell lysate in Fast Digest buffer (Thermo Fisher Scientific) containing RNase for 2 h 20 min at 37°C. pBR322 was isolated from *E. coli* *dam*<sup>+</sup> *dcm*<sup>+</sup> (Thermo Fisher Scientific) and pFGG3 was isolated from *E. coli* GM119 *dam*<sup>-</sup> *dcm*<sup>-</sup> (Table S1). Lane PBS: plasmids pBR322 and pFGG3 treated with PBS.
