# Supplementary material for: Type II Restriction-Modification System from Gardnerella vaginalis ATCC 14018
Source: MDPI journal article supplement (doi:10.3390/pathogens9090703), 2020-08-27
Supplement: s1 [file s1]

**Table S1. Bacterial strains used in this study**

| Strain             | Genotype or purpose                                                                                                                                                                                                                                                                | Reference or source       |
|--------------------|------------------------------------------------------------------------------------------------------------------------------------------------------------------------------------------------------------------------------------------------------------------------------------|---------------------------|
| DH10B              | F <sup>-</sup> <i>mcrA</i> $\Delta$ ( <i>mrr-hsdRMS-mcrBC</i> ) $\phi$ 80 <i>lacZ</i> $\Delta$ M15 $\Delta$ <i>lacX74</i> <i>recA1</i> <i>endA1</i> <i>araD139</i> $\Delta$ ( <i>ara-leu</i> )7697 <i>galU</i> <i>galK</i> $\lambda^-$ <i>rpsL</i> (Str <sup>R</sup> ) <i>nupG</i> | Thermo Fisher Scientific  |
| DH10B-Me           | Methylation-proficient DH10B carrying plasmid pACYC-Me                                                                                                                                                                                                                             | This study                |
| DH10B-RSFMe        | Methylation-proficient DH10B carrying plasmid pRSFori-Me                                                                                                                                                                                                                           | This study                |
| Tuner(DE3)         | F <sup>-</sup> <i>ompT</i> <i>hsdS<sub>B</sub></i> ( <i>r<sub>B</sub></i> <sup>-</sup> <i>m<sub>B</sub></i> <sup>-</sup> ) <i>gal dcm lacY1</i> (DE3)                                                                                                                              | Novagen, Merck, USA       |
| ER2566             | <i>fhuA2 lacZ::T7 gene1</i> [ <i>Ion</i> ] <i>ompT gal sulA11</i> R( <i>mcr-73::miniTn10-Tet<sup>S</sup></i> )2 [ <i>dcm</i> ] R( <i>zgb-210::Tn10-Tet<sup>S</sup></i> ) <i>endA1</i> $\Delta$ ( <i>mcrC-mrr</i> )114::IS10                                                        | New England Biolabs, USA  |
| ER2566-Me          | Methylation-proficient ER2566 carrying plasmid pACYC-Me                                                                                                                                                                                                                            | This study                |
| ArcticExpress(DE3) | <i>E. coli</i> B F <sup>-</sup> <i>ompT</i> <i>hsdS</i> ( <i>r<sub>B</sub></i> <sup>-</sup> <i>m<sub>B</sub></i> <sup>-</sup> ) <i>dcm</i> <sup>+</sup> <i>Tet<sup>r</sup>gal</i> $\lambda$ (DE3) <i>endA</i> Hte [ <i>cpn10 cpn60</i> Gent <sup>r</sup> ]                         | Agilent Technologies, USA |
| LMG194             | F <sup>-</sup> $\Delta$ <i>lacX74</i> <i>galE thi rpsL</i> (Str <sup>R</sup> ) $\Delta$ <i>phoA</i> ( <i>PvuII</i> ) $\Delta$ <i>ara714 leu::Tn10</i>                                                                                                                              | Thermo Fisher Scientific  |
| LMG194-Me          | Methylation-proficient LMG194 carrying plasmid pACYC-Me                                                                                                                                                                                                                            | This study                |
| LMG194-RSFMe       | Methylation-proficient LMG194 carrying plasmid pRSF ori-Me                                                                                                                                                                                                                         | This study                |
| GM119              | F- <i>supE44 lacY1 galK2 galT22 metB1 dam-3 dcm-6 tsx-78 lambda-</i>                                                                                                                                                                                                               | [1]                       |

1. Arraj, J. A.; Marinus, M. G. Phenotypic reversal in *dam* mutants of *Escherichia coli* K-12 by a recombinant plasmid containing the *dam*<sup>+</sup> gene. *J. Bacteriol.* **1983**, *153*, 562–565.
