# Supplementary material for: Type II Restriction-Modification System from Gardnerella vaginalis ATCC 14018
Source: MDPI journal article supplement (doi:10.3390/pathogens9090703), 2020-08-27
Supplement: s1 [file s1]

**Table S2. Plasmids used in this study**

| Plasmid     | Genotype or purpose                                                                                  | Reference or source      |
|-------------|------------------------------------------------------------------------------------------------------|--------------------------|
| pBR322      | Substrate for REase activity assay                                                                   | Thermo Fisher Scientific |
| pFGG3       | Substrate for REase activity assay                                                                   | [1]                      |
| pUC57       | Ap <sup>R</sup> ; pMB1 replication origin; cloning vector / REase activity assay substrate           | Thermo Fisher Scientific |
| pJET1.2     | Ap <sup>R</sup> ; pMB1 replication origin; cloning vector                                            | Thermo Fisher Scientific |
| pET28a(+)   | Km <sup>R</sup> ; pMB1 replication origin; expression vector                                         | Novagen, Merck           |
| pBAD/HisA   | Ap <sup>R</sup> ; pMB1 replication origin; expression vector                                         | Thermo Fisher Scientific |
| pACYC184    | Tc <sup>R</sup> , Cm <sup>R</sup> ; p15A replication origin; expression vector for <i>gva14018IM</i> | New England Biolabs, USA |
| pRSF-Duet-1 | Km <sup>R</sup> ; RSF1030 replication origin donor                                                   | Novagen, Merck           |
| pACYC-Me    | Cm <sup>R</sup> ; pACYC184 carrying <i>gva14018IM</i>                                                | This study               |
| pRSFori-Me  | Cm <sup>R</sup> ; RSF1030 replication origin substituted for p15A in pACYC-Me                        | This study               |

1. Slibinskas, R.; Samuel, D.; Gedvilaite, A.; Staniulis, J.; Sasnauskas, K. Synthesis of the measles virus nucleoprotein in yeast *Pichia pastoris* and *Saccharomyces cerevisiae*. *J Biotechnol* **2004**, *107*, 115–124, doi:10.1016/j.jbiotec.2003.10.018.
