# Supplementary material for: Type II Restriction-Modification System from Gardnerella vaginalis ATCC 14018
Source: MDPI journal article supplement (doi:10.3390/pathogens9090703), 2020-08-27
Supplement: s1 [file s1]

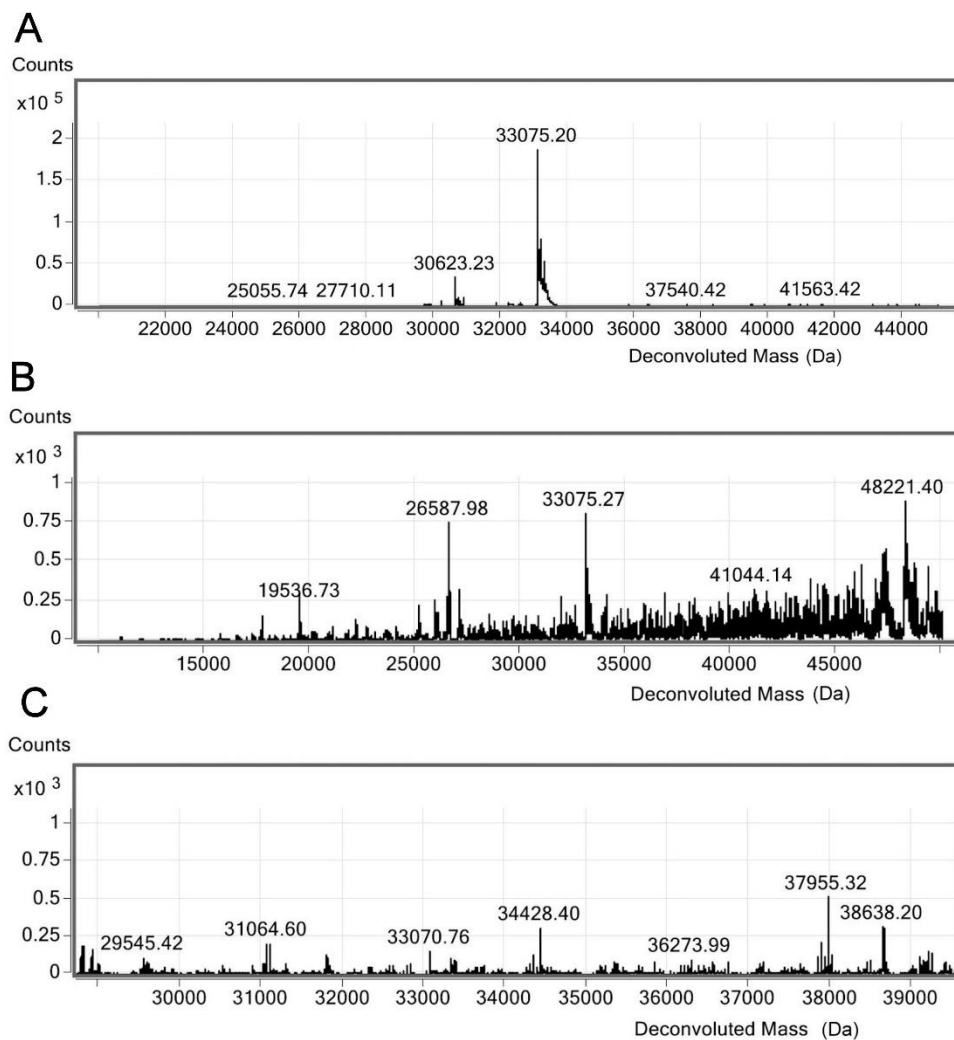

**Figure S4.** Molecular mass determination of R.Gva14018I-4 by mass spectrometry. (A) Purified R.Gva14018I-4. (B) R.Gva14018I-4 (0.1 $\mu$ g) immunoprecipitated with specific pAbs (2.23  $\mu$ g). (C) Anti-R.Gva14018I-4 pAbs.
