# Supplementary material for: Type II Restriction-Modification System from Gardnerella vaginalis ATCC 14018
Source: MDPI journal article supplement (doi:10.3390/pathogens9090703), 2020-08-27
Supplement: s1 [file s1]

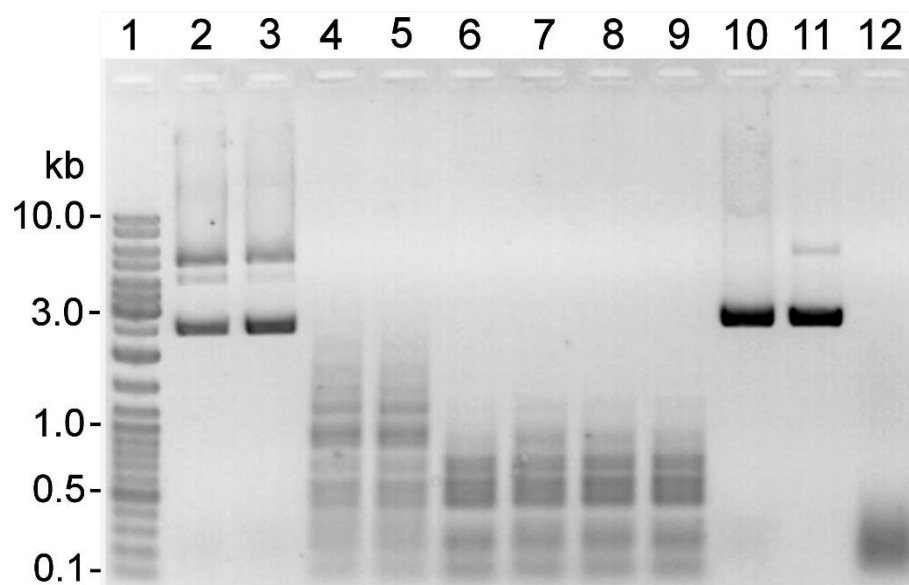

**Figure S1.** Enzymatic activity in the cell-free culture supernatants from *G. vaginalis* ATCC 14018 at various time points during cultivation. pBR322 was incubated with samples taken from duplicate cultures after 0 h of cultivation,  $OD_{600} = 0$  (lanes 2, 3), 16 h at  $OD_{600} = 0.019$  of the first culture and  $OD_{600} = 0.013$  of the second culture (lanes 4, 5), 24 h,  $OD_{600} = 0.380$ ,  $0.377$  (lanes 6, 7), and 44 h,  $OD_{600} = 0.300$ ,  $0.283$  (lanes 8, 9). Lane 1: Gene Ruler™ Ladder Mix (Thermo Fisher Scientific); lane 10: pBR322 incubated with sBHI medium, lane 11: untreated pBR322; lane 12: pBR322 treated with *S. pneumoniae* culture supernatant.
